# Supplementary material for: Evaluation of green chemistry metrics for sustainable recycling of platinum group metals from spent automotive catalysts via bioleaching
Source: Royal Society of Chemistry journal article supplement (doi:10.1039/d3gc03918h), 2024-01-01
Supplement: d3gc03918h1.pdf [file d3gc03918h1.pdf]

### Supplementary Information

#### **Evaluation of green chemistry metrics for sustainable recycling of platinum group metals from spent automotive catalysts via bioleaching**

Salman Karim,<sup>a</sup> Saw Han Mei<sup>a</sup> and Yen-Peng Ting<sup>\*a</sup>

<sup>a</sup> *Department of Chemical and Biomolecular Engineering, National University of Singapore, Singapore 117585*

\* Corresponding author. *Email address:* [chetyp@nus.edu.sg](mailto:chetyp@nus.edu.sg)

**Table S1** Concentration of PGM in pretreated SAC

| <b>Metal</b> | <b>SAC Batch I for <i>P. fluorescens</i> and<br/><i>B. megaterium</i> (mg/kg)</b> | <b>SAC Batch II for <i>C. violaceum</i><br/>(mg/kg)</b> |
|--------------|-----------------------------------------------------------------------------------|---------------------------------------------------------|
| Pt           | 1908                                                                              | 1112                                                    |
| Pd           | 1451                                                                              | 743                                                     |
| Rh           | 535                                                                               | 184                                                     |

**Table S2** The mass-based calculations

| Mass-based Calculations                | Equation                                                                                                                                                                                                                                                                                                                                                     |
|----------------------------------------|--------------------------------------------------------------------------------------------------------------------------------------------------------------------------------------------------------------------------------------------------------------------------------------------------------------------------------------------------------------|
|                                        | Concentration of glycine 5 g/L                                                                                                                                                                                                                                                                                                                               |
| Initial mass of glycine                | $\text{Initial mass of glycine} = \text{Concentration of glycine} \times \text{Volume of solution}$ $\text{Initial mass of glycine} = 5 \left( \frac{\text{g}}{\text{L}} \right) \times \frac{100 \text{ mL}}{1000 \text{ mL/L}} = 0.5 \text{ g}$                                                                                                            |
| Mass of SAC used                       | $\text{Mass of SAC sample} = \text{Pulp density of SAC} \times \text{Volume of solution}$                                                                                                                                                                                                                                                                    |
| Initial mass of PGM in the SAC         | $\text{Mass of PGM} = \frac{\text{Mass of PGM (g)}}{\text{Mass of SAC (g)}} \times \text{Mass of SAC sample (g)}$                                                                                                                                                                                                                                            |
| Initial mass of free CN ion            | $\text{Mass of free CN ion} = \text{Conc. of free CN ion} \left( \frac{\text{mg}}{\text{L}} \right) \times 10^{-3} \left( \frac{\text{g}}{\text{mg}} \right) \times \text{Volume of solution (L)}$                                                                                                                                                           |
|                                        | $\text{Mass of metal recovered (g)} = \frac{\% \text{ Recovery}}{100 \%} \times \text{Initial mass of PGM in the SAC (g)}$                                                                                                                                                                                                                                   |
| Mass of metal-cyanide complex produced | $\text{No. of moles of metal recovered (mol)} = \frac{\text{Mass of metal recovered (g)}}{\text{Molar mass of metal} \left( \frac{\text{g}}{\text{mol}} \right)}$ $\text{No. of moles of metal - cyanide (mol)} = \text{No. of moles of metal (mol)} \times \frac{\text{Stoichiometric coeffi. of metal - cyanide}}{\text{Stoichiometric coeffi. of metal}}$ |
|                                        | $\text{Mass of metal - cyanide (g)} = \text{No. of mol of metal - cyanide (mol)} \times \text{Molar mass of metal - cyanide} \left( \frac{\text{g}}{\text{mol}} \right)$                                                                                                                                                                                     |

**Table S3** Green chemistry metrics for metal limiting reactions for *P. fluorescens* and *B. megaterium* at pulp density 0.5 % w/v

| Limiting reagent (Metal)                    |                     |                                   |        |        |          |                                  |        |        |          |
|---------------------------------------------|---------------------|-----------------------------------|--------|--------|----------|----------------------------------|--------|--------|----------|
|                                             |                     | <i>P. fluorescens</i> (0.5 % w/v) |        |        |          | <i>B. megaterium</i> (0.5 % w/v) |        |        |          |
|                                             |                     | Pt                                | Pd     | Rh     | Overall  | Pt                               | Pd     | Rh     | Overall  |
| Percentage Yield                            | Y                   | 44.00                             | 54.00  | 96.00  | 58.19    | 40.00                            | 51.00  | 94.00  | 55.03    |
| Effective Mass Yield                        | YE                  | 3.41                              | 4.11   | 3.42   | 10.93    | 3.10                             | 3.88   | 3.34   | 10.32    |
| Percentage Conversion                       | C1a                 | 44.00                             | 54.00  | 96.00  | 58.19    | 40.00                            | 51.00  | 94.00  | 55.03    |
|                                             | C1b                 | 44.00                             | 54.00  | 96.00  | 58.19    | 40.00                            | 51.00  | 94.00  | 55.03    |
| Selectivity                                 | S1                  | 1.00                              | 1.00   | 1.00   | 1.00     | 1.00                             | 1.00   | 1.00   | 1.00     |
|                                             | S2                  | 0.35                              | 0.80   | 0.43   |          | 0.33                             | 0.79   | 0.45   |          |
| Atom Economy                                | AE1                 | 89.79                             | 86.07  | 83.55  | 85.80    | 89.79                            | 86.07  | 83.55  | 85.80    |
|                                             | AE2                 | 100.00                            | 100.00 | 100.00 | 100.00   | 100.00                           | 100.00 | 100.00 | 100.00   |
|                                             | AE2 (glycine)       | 60.40                             | 51.72  | 46.84  | 51.17    | 60.40                            | 51.72  | 46.84  | 51.17    |
| Atom Utilization                            | AU                  | 89.79                             | 86.07  | 83.55  | 86.37    | 89.79                            | 86.07  | 83.55  | 86.30    |
| Stoichiometric Factor                       | SF                  | 1.34                              | 1.48   | 1.58   | 1.78     | 1.27                             | 1.39   | 1.47   | 1.63     |
| Maximum RME (Kernel's RME)                  | Kernel's RME        | 44.00                             | 54.00  | 96.00  | 58.19    | 40.00                            | 51.00  | 94.00  | 55.03    |
| Curzon's RME                                | Curzon's RME 1      | 32.92                             | 36.50  | 60.64  | 40.13    | 31.43                            | 36.74  | 63.86  | 40.24    |
|                                             | Curzon's RME 2      | 32.92                             | 36.50  | 60.64  | 32.63    | 31.43                            | 36.74  | 63.86  | 33.68    |
| Simple E-Factor                             | sEF                 |                                   |        |        | 0.53     |                                  |        |        | 0.59     |
| Simple E-Factor (account for pretreatment)  | sEF (pretreatment)  |                                   |        |        | 9.68     |                                  |        |        | 10.28    |
| Complex E-Factor                            | cEF                 |                                   |        |        | 222.70   |                                  |        |        | 235.84   |
| Complex E-Factor (account for pretreatment) | cEF (pretreatment)  |                                   |        |        | 231.85   |                                  |        |        | 245.53   |
| Carbon Efficiency                           | CE1                 | 22.36                             | 27.44  | 48.78  | 31.16    | 22.43                            | 28.59  | 52.70  | 32.67    |
|                                             | CE2                 | 0.13                              | 0.22   | 0.22   | 0.58     | 0.12                             | 0.21   | 0.22   | 0.55     |
| Mass Intensity                              | MI                  | 3.04                              | 2.74   | 1.65   | 2.49     | 3.18                             | 2.72   | 1.57   | 2.49     |
| Mass Intensity (account for pretreatment)   | MI (pretreatment)   |                                   |        |        | 11.64    |                                  |        |        | 12.18    |
| Process Mass Intensity                      | PMI1                |                                   |        |        | 1.53     |                                  |        |        | 1.59     |
|                                             | PMI2                |                                   |        |        | 48414.66 |                                  |        |        | 51271.49 |
| Process Mass Intensity                      | PMI1 (pretreatment) |                                   |        |        | 10.68    |                                  |        |        | 11.28    |

|                                              |                     |  |  |  |          |  |  |  |          |
|----------------------------------------------|---------------------|--|--|--|----------|--|--|--|----------|
| (account for pretreatment)                   | PMI2 (pretreatment) |  |  |  | 48423.81 |  |  |  | 51281.18 |
| Mass productivity                            | MP1                 |  |  |  | 0.40     |  |  |  | 0.40     |
|                                              | MP2                 |  |  |  | 0.65     |  |  |  | 0.63     |
| Mass productivity (account for pretreatment) | MP1 (pretreatment)  |  |  |  | 0.09     |  |  |  | 0.08     |
|                                              | MP2 (pretreatment)  |  |  |  | 0.09     |  |  |  | 0.09     |
| Solvent intensity                            | SI                  |  |  |  | 48412.17 |  |  |  | 51269.00 |
| Solvent intensity (account for pretreatment) | SI (pretreatment)   |  |  |  | 48421.32 |  |  |  | 51278.69 |

**Table S4** Green chemistry metrics for metal limiting reactions for *C. violaceum* at pulp densities 0.5 % w/v, 1 % w/v and 2 % w/v

| Limiting reagent (Metal)                          |                     |                                 |        |        |          |                               |        |        |          |                               |        |        |          |
|---------------------------------------------------|---------------------|---------------------------------|--------|--------|----------|-------------------------------|--------|--------|----------|-------------------------------|--------|--------|----------|
|                                                   |                     | <i>C. violaceum</i> (0.5 % w/v) |        |        |          | <i>C. violaceum</i> (1 % w/v) |        |        |          | <i>C. violaceum</i> (2 % w/v) |        |        |          |
|                                                   |                     | Pt                              | Pd     | Rh     | Overall  | Pt                            | Pd     | Rh     | Overall  | Pt                            | Pd     | Rh     | Overall  |
| Percentage Yield                                  | Y                   | 69.00                           | 74.00  | 99.00  | 75.11    | 62.00                         | 69.00  | 96.00  | 69.57    | 42.00                         | 49.00  | 84.00  | 50.56    |
| Effective Mass Yield                              | YE                  | 2.20                            | 2.03   | 0.86   | 5.09     | 1.97                          | 1.90   | 0.83   | 4.70     | 1.34                          | 1.35   | 0.73   | 3.41     |
| Percentage Conversion                             | C1a                 | 69.00                           | 74.00  | 99.00  | 75.11    | 62.00                         | 69.00  | 96.00  | 69.57    | 42.00                         | 49.00  | 84.00  | 50.56    |
|                                                   | C1b                 | 69.00                           | 74.00  | 99.00  | 75.11    | 62.00                         | 69.00  | 96.00  | 69.57    | 42.00                         | 49.00  | 84.00  | 50.56    |
| Selectivity                                       | S1                  | 1.00                            | 1.00   | 1.00   | 1.00     | 1.00                          | 1.00   | 1.00   | 1.00     | 1.00                          | 1.00   | 1.00   | 1.00     |
|                                                   | S2                  | 0.57                            | 0.91   | 0.19   |          | 0.54                          | 0.92   | 0.20   |          | 0.49                          | 0.88   | 0.26   |          |
| Atom Economy                                      | AE1                 | 89.79                           | 86.07  | 83.55  | 85.80    | 89.79                         | 86.07  | 83.55  | 85.80    | 89.79                         | 86.07  | 83.55  | 85.80    |
|                                                   | AE2                 | 100.00                          | 100.00 | 100.00 | 100.00   | 100.00                        | 100.00 | 100.00 | 100.00   | 100.00                        | 100.00 | 100.00 | 100.00   |
|                                                   | AE2 (glycine)       | 60.40                           | 51.72  | 46.84  | 51.17    | 60.40                         | 51.72  | 46.84  | 51.17    | 60.40                         | 51.72  | 46.84  | 51.17    |
| Atom Utilization                                  | AU                  | 89.79                           | 86.07  | 83.55  | 87.19    | 89.79                         | 86.07  | 83.55  | 87.12    | 89.79                         | 86.07  | 83.55  | 86.92    |
| Stoichiometric Factor                             | SF                  | 3.04                            | 3.91   | 4.54   | 5.47     | 1.85                          | 2.21   | 2.47   | 2.86     | 1.25                          | 1.36   | 1.43   | 1.55     |
| Maximum RME (Kernel's RME)                        | Kernel's RME        | 69.00                           | 74.00  | 99.00  | 75.11    | 62.00                         | 69.00  | 96.00  | 69.57    | 42.00                         | 49.00  | 84.00  | 50.56    |
| Curzon's RME                                      | Curzon's RME 1      | 22.68                           | 18.94  | 21.82  | 20.89    | 33.56                         | 31.27  | 38.91  | 33.39    | 33.61                         | 36.15  | 58.64  | 38.13    |
|                                                   | Curzon's RME 2      | 22.68                           | 18.94  | 21.82  | 13.72    | 33.56                         | 31.27  | 38.91  | 24.36    | 33.61                         | 36.15  | 58.64  | 32.68    |
| Simple E-Factor                                   | sEF                 |                                 |        |        | 0.39     |                               |        |        | 0.35     |                               |        |        | 0.63     |
| Simple E-Factor (account for pretreatment)        | sEF (pretreatment)  |                                 |        |        | 20.05    |                               |        |        | 21.63    |                               |        |        | 29.96    |
| Complex E-Factor                                  | cEF                 |                                 |        |        | 308.39   |                               |        |        | 361.54   |                               |        |        | 506.56   |
| Complex E-Factor (account for pretreatment)       | cEF (pretreatment)  |                                 |        |        | 328.05   |                               |        |        | 382.82   |                               |        |        | 535.89   |
| Carbon Efficiency                                 | CE1                 | 10.04                           | 10.77  | 14.41  | 11.13    | 18.04                         | 20.08  | 27.94  | 20.70    | 24.45                         | 28.52  | 48.89  | 30.56    |
|                                                   | CE2                 | 0.12                            | 0.16   | 0.08   | 0.35     | 0.21                          | 0.29   | 0.15   | 0.66     | 0.29                          | 0.41   | 0.27   | 0.97     |
| Mass Intensity                                    | MI                  | 4.41                            | 5.28   | 4.58   | 4.79     | 2.98                          | 3.20   | 2.57   | 3.00     | 2.98                          | 2.77   | 1.71   | 2.62     |
| Mass Intensity (account for pretreatment)         | MI (pretreatment)   |                                 |        |        | 24.45    |                               |        |        | 24.27    |                               |        |        | 31.95    |
| Process Mass Intensity                            | PMI1                |                                 |        |        | 1.39     |                               |        |        | 1.35     |                               |        |        | 1.63     |
|                                                   | PMI2                |                                 |        |        | 73431.22 |                               |        |        | 39733.14 |                               |        |        | 27384.13 |
| Process Mass Intensity (account for pretreatment) | PMI1 (pretreatment) |                                 |        |        | 21.05    |                               |        |        | 22.63    |                               |        |        | 30.96    |

|                                                       |                            |  |  |  |              |  |  |  |              |  |  |  |              |
|-------------------------------------------------------|----------------------------|--|--|--|--------------|--|--|--|--------------|--|--|--|--------------|
| pretreatment)                                         | PMI2<br>(pretreat<br>ment) |  |  |  | 73450.<br>88 |  |  |  | 39754.<br>42 |  |  |  | 27413.<br>46 |
| Mass<br>productivity                                  | MP1                        |  |  |  | 0.21         |  |  |  | 0.33         |  |  |  | 0.38         |
|                                                       | MP2                        |  |  |  | 0.72         |  |  |  | 0.74         |  |  |  | 0.61         |
| Mass<br>productivity<br>(account for<br>pretreatment) | MP1<br>(pretreat<br>ment)  |  |  |  | 0.04         |  |  |  | 0.04         |  |  |  | 0.03         |
|                                                       | MP2<br>(pretreat<br>ment)  |  |  |  | 0.05         |  |  |  | 0.04         |  |  |  | 0.03         |
| Solvent<br>intensity                                  | SI                         |  |  |  | 73426.<br>43 |  |  |  | 39730.<br>14 |  |  |  | 27381.<br>51 |
| Solvent<br>intensity<br>(account for<br>pretreatment) | SI<br>(pretreat<br>ment)   |  |  |  | 73446.<br>09 |  |  |  | 39751.<br>42 |  |  |  | 27410.<br>84 |

**Table S5** Green chemistry metrics for cyanide limiting reactions for *P. fluorescens* at pulp density 1 %w/v, *B. megaterium* at pulp density 1 % w/v, and *C. violaceum* at pulp densities 4 % w/v

| Limiting Reagent (Cyanide)                  |                    |                                 |        |        |         |                                |        |        |         |                               |        |        |         |
|---------------------------------------------|--------------------|---------------------------------|--------|--------|---------|--------------------------------|--------|--------|---------|-------------------------------|--------|--------|---------|
|                                             |                    | <i>P. fluorescens</i> (1 % w/v) |        |        |         | <i>B. megaterium</i> (1 % w/v) |        |        |         | <i>C. violaceum</i> (4 % w/v) |        |        |         |
|                                             |                    | Pt                              | Pd     | Rh     | Overall | Pt                             | Pd     | Rh     | Overall | Pt                            | Pd     | Rh     | Overall |
| Percentage Yield                            | Y1                 | 12.09                           | 19.58  | 23.04  | 54.70   | 12.28                          | 20.13  | 24.02  | 56.44   | 12.94                         | 18.03  | 12.57  | 43.53   |
|                                             | Y2                 | 38.61                           | 44.71  | 92.47  | 54.70   | 39.24                          | 45.97  | 96.43  | 56.44   | 34.92                         | 39.58  | 72.18  | 43.53   |
| Effective Mass Yield                        | YE                 | 2.94                            | 3.35   | 3.24   | 9.52    | 2.71                           | 3.12   | 3.06   | 8.89    | 0.96                          | 0.93   | 0.54   | 2.43    |
| Percentage Conversion                       | C1a                | 38.61                           | 44.71  | 92.47  | 54.70   | 39.24                          | 45.97  | 96.43  | 56.44   | 34.92                         | 39.58  | 72.18  | 43.53   |
|                                             | C1b                | 38.61                           | 44.71  | 92.47  | 54.70   | 39.24                          | 45.97  | 96.43  | 56.44   | 34.92                         | 39.58  | 72.18  | 43.53   |
|                                             | C2                 |                                 |        |        | 94.72   |                                |        |        | 95.03   |                               |        |        | 97.82   |
| Selectivity                                 | S1                 | 0.13                            | 0.21   | 0.24   | 0.58    | 0.13                           | 0.21   | 0.25   | 0.59    | 0.13                          | 0.18   | 0.13   | 0.45    |
|                                             | S2                 | 0.35                            | 0.71   | 0.49   |         | 0.34                           | 0.71   | 0.49   |         | 0.49                          | 0.85   | 0.27   |         |
| Atom Economy                                | AE1                | 89.79                           | 86.07  | 83.55  | 85.80   | 89.79                          | 86.07  | 83.55  | 85.80   | 89.79                         | 86.07  | 83.55  | 85.80   |
|                                             | AE2                | 100.00                          | 100.00 | 100.00 | 100.00  | 100.00                         | 100.00 | 100.00 | 100.00  | 100.00                        | 100.00 | 100.00 | 100.00  |
|                                             | AE2 (Glycine)      | 60.40                           | 51.72  | 46.84  | 51.17   | 60.40                          | 51.72  | 46.84  | 51.17   | 60.40                         | 51.72  | 46.84  | 51.17   |
| Atom Utilization                            | AU                 | 89.79                           | 86.07  | 83.55  | 86.29   | 89.79                          | 86.07  | 83.55  | 86.26   | 89.79                         | 86.07  | 83.55  | 86.91   |
| Stoichiometric Factor                       | SF                 | 1.01                            | 1.01   | 1.01   | 1.01    | 1.08                           | 1.06   | 1.05   | 1.07    | 1.11                          | 1.08   | 1.06   | 1.09    |
| Maximum RME (Kernel's RME)                  | Kernel's RME       | 38.61                           | 44.71  | 92.47  | 54.70   | 39.24                          | 45.97  | 96.43  | 56.44   | 34.92                         | 39.58  | 72.18  | 43.53   |
| Curzon's RME                                | Curzon's RME 1     | 38.21                           | 44.35  | 91.88  | 50.76   | 36.37                          | 43.32  | 91.99  | 49.45   | 31.55                         | 36.55  | 67.75  | 38.04   |
|                                             | Curzon's RME 2     | 38.21                           | 44.35  | 91.89  | 54.22   | 36.37                          | 43.32  | 92.04  | 52.94   | 31.55                         | 36.55  | 67.80  | 39.87   |
| Simple E-Factor                             | sEF                |                                 |        |        | 0.61    |                                |        |        | 0.69    |                               |        |        | 1.05    |
| Simple E-Factor (account for pretreatment)  | sEF (pretreatment) |                                 |        |        | 11.11   |                                |        |        | 11.94   |                               |        |        | 42.29   |
| Complex E-Factor                            | cEF                |                                 |        |        | 261.05  |                                |        |        | 279.80  |                               |        |        | 731.41  |
| Complex E-Factor (account for pretreatment) | cEF (pretreatment) |                                 |        |        | 271.55  |                                |        |        | 291.05  |                               |        |        | 772.65  |
| Carbon Efficiency                           | CE                 | 38.61                           | 44.71  | 92.47  | 54.70   | 39.24                          | 45.97  | 96.43  | 56.44   | 34.92                         | 39.58  | 72.18  | 43.53   |
|                                             | CE (glycine)       | 0.22                            | 0.36   | 0.43   | 1.01    | 0.21                           | 0.34   | 0.40   | 0.94    | 0.41                          | 0.57   | 0.40   | 1.38    |
| Mass Intensity                              | MI                 | 2.62                            | 2.25   | 1.09   | 1.97    | 2.75                           | 2.31   | 1.09   | 2.02    | 3.17                          | 2.74   | 1.48   | 2.63    |



|                                                            |                            |  |  |  |              |  |  |  |              |  |  |  |              |
|------------------------------------------------------------|----------------------------|--|--|--|--------------|--|--|--|--------------|--|--|--|--------------|
| Mass Intensity<br>(account for<br>pretreatment)            | MI<br>(pretreat<br>ment)   |  |  |  | 12.47        |  |  |  | 13.28        |  |  |  | 43.86        |
| Process Mass<br>Intensity                                  | PMI1                       |  |  |  | 1.61         |  |  |  | 1.69         |  |  |  | 2.05         |
|                                                            | PMI2                       |  |  |  | 27773.<br>06 |  |  |  | 29767.<br>62 |  |  |  | 19250.<br>40 |
| Process Mass<br>Intensity<br>(account for<br>pretreatment) | PMI1<br>(pretreat<br>ment) |  |  |  | 12.11        |  |  |  | 12.94        |  |  |  | 43.29        |
|                                                            | PMI2<br>(pretreat<br>ment) |  |  |  | 27783.<br>56 |  |  |  | 29778.<br>88 |  |  |  | 19291.<br>60 |
| Mass<br>productivity                                       | MP1                        |  |  |  | 0.51         |  |  |  | 0.49         |  |  |  | 0.38         |
|                                                            | MP2                        |  |  |  | 0.62         |  |  |  | 0.59         |  |  |  | 0.49         |
| Mass<br>productivity<br>(account for<br>pretreatment)      | MP1<br>(pretreat<br>ment)  |  |  |  | 0.08         |  |  |  | 0.08         |  |  |  | 0.02         |
|                                                            | MP2<br>(pretreat<br>ment)  |  |  |  | 0.08         |  |  |  | 0.08         |  |  |  | 0.02         |
| Solvent<br>intensity                                       | SI                         |  |  |  | 27771.<br>09 |  |  |  | 29765.<br>60 |  |  |  | 19247.<br>70 |
| Solvent<br>intensity<br>(account for<br>pretreatment)      | SI<br>(pretreat<br>ment)   |  |  |  | 27781.<br>59 |  |  |  | 29776.<br>85 |  |  |  | 19289.<br>00 |

**Table S6** Green chemistry metrics for cyanide limiting reactions (Rh99) for *P. fluorescens* and *B. megaterium* at pulp density 2 % w/v

| Limiting Reagent (Cyanide) (Rh99)                 |                     |                                 |        |        |          |                                |        |        |          |
|---------------------------------------------------|---------------------|---------------------------------|--------|--------|----------|--------------------------------|--------|--------|----------|
|                                                   |                     | <i>P. fluorescens</i> (2 % w/v) |        |        |          | <i>B. megaterium</i> (2 % w/v) |        |        |          |
|                                                   |                     | Pt                              | Pd     | Rh     | Overall  | Pt                             | Pd     | Rh     | Overall  |
| Percentage Yield                                  | Y1                  | 19.08                           | 32.04  | 42.02  | 93.14    | 19.65                          | 31.42  | 43.02  | 94.09    |
|                                                   | Y2                  | 79.55                           | 95.45  | 99.00  | 93.14    | 83.38                          | 95.29  | 99.00  | 94.09    |
| Effective Mass Yield                              | YE                  | 2.32                            | 2.74   | 2.95   | 8.01     | 2.17                           | 2.43   | 2.74   | 7.34     |
| Percentage Conversion                             | C1a                 | 79.55                           | 95.45  | 99.00  | 93.14    | 83.38                          | 95.29  | 99.00  | 94.09    |
|                                                   | C1b                 | 79.55                           | 95.45  | 99.00  | 93.14    | 83.38                          | 95.29  | 99.00  | 94.09    |
|                                                   | C2                  |                                 |        |        | 95.41    |                                |        |        | 96.31    |
| Selectivity                                       | S1                  | 0.20                            | 0.34   | 0.44   | 0.98     | 0.20                           | 0.33   | 0.45   | 0.98     |
|                                                   | S2                  | 0.32                            | 0.68   | 0.55   |          | 0.33                           | 0.65   | 0.56   |          |
| Atom Economy                                      | AE1                 | 89.79                           | 86.07  | 83.55  | 85.80    | 89.79                          | 86.07  | 83.55  | 85.80    |
|                                                   | AE2                 | 100.00                          | 100.00 | 100.00 | 100.00   | 100.00                         | 100.00 | 100.00 | 100.00   |
|                                                   | AE2 (Glycine)       | 60.40                           | 51.72  | 46.84  | 51.17    | 60.40                          | 51.72  | 46.84  | 51.17    |
| Atom Utilization                                  | AU                  | 89.79                           | 86.07  | 83.55  | 86.14    | 89.79                          | 86.07  | 83.55  | 86.15    |
| Stoichiometric Factor                             | SF                  | 2.08                            | 1.83   | 1.08   | 1.66     | 2.29                           | 2.00   | 1.11   | 1.78     |
| Maximum RME (Kernel's RME)                        | Kernel's RME        | 79.55                           | 95.45  | 99.00  | 93.14    | 83.38                          | 95.29  | 99.00  | 94.09    |
| Curzon's RME                                      | Curzon's RME 1      | 38.30                           | 52.06  | 91.95  | 55.13    | 36.41                          | 47.68  | 88.90  | 51.92    |
|                                                   | Curzon's RME 2      | 38.30                           | 52.06  | 91.95  | 56.20    | 36.41                          | 47.68  | 88.90  | 52.72    |
| Simple E-Factor                                   | sEF                 |                                 |        |        | 0.80     |                                |        |        | 0.91     |
| Simple E-Factor (account for pretreatment)        | sEF (pretreatment)  |                                 |        |        | 13.28    |                                |        |        | 14.54    |
| Complex E-Factor                                  | cEF                 |                                 |        |        | 313.62   |                                |        |        | 342.35   |
| Complex E-Factor (account for pretreatment)       | cEF (pretreatment)  |                                 |        |        | 326.10   |                                |        |        | 355.97   |
| Carbon Efficiency                                 | CE                  | 79.55                           | 95.45  | 99.00  | 93.14    | 83.38                          | 95.29  | 99.00  | 94.09    |
|                                                   | CE (glycine)        | 0.35                            | 0.59   | 0.78   | 1.72     | 0.33                           | 0.53   | 0.72   | 1.57     |
| Mass Intensity                                    | MI                  | 2.74                            | 2.08   | 0.84   | 1.81     | 2.88                           | 2.27   | 0.86   | 1.93     |
| Mass Intensity (account for pretreatment)         | MI (pretreatment)   |                                 |        |        | 14.29    |                                |        |        | 15.55    |
| Process Mass Intensity                            | PMI1                |                                 |        |        | 1.80     |                                |        |        | 1.91     |
|                                                   | PMI2                |                                 |        |        | 16507.98 |                                |        |        | 18020.30 |
| Process Mass Intensity (account for pretreatment) | PMI1 (pretreatment) |                                 |        |        | 14.28    |                                |        |        | 15.54    |

|                                                       |                        |  |  |  |          |  |  |  |          |
|-------------------------------------------------------|------------------------|--|--|--|----------|--|--|--|----------|
|                                                       | PMI2<br>(pretreatment) |  |  |  | 16520.46 |  |  |  | 18033.90 |
| Mass<br>productivity                                  | MP1                    |  |  |  | 0.55     |  |  |  | 0.52     |
|                                                       | MP2                    |  |  |  | 0.55     |  |  |  | 0.52     |
| Mass<br>productivity<br>(account for<br>pretreatment) | MP1<br>(pretreatment)  |  |  |  | 0.07     |  |  |  | 0.06     |
|                                                       | MP2<br>(pretreatment)  |  |  |  | 0.07     |  |  |  | 0.06     |
| Solvent intensity                                     | SI                     |  |  |  | 16506.17 |  |  |  | 18018.40 |
| Solvent intensity<br>(account for<br>pretreatment)    | SI<br>(pretreatment)   |  |  |  | 16518.65 |  |  |  | 18032.00 |

**Table S7** Correlation between green chemistry metrics for metal limiting reactions

| Pulp density and bacteria  | Product    | Metal limiting reactions     |         |                               |           |           |           |                  |           |
|----------------------------|------------|------------------------------|---------|-------------------------------|-----------|-----------|-----------|------------------|-----------|
|                            |            | Y = C1a = C1b = Kernel's RME | S1 > S2 | Curzon's RME1 = Curzon's RME2 | AE1 < AE2 | sEF < cEF | CE1 > CE2 | PMI1 < MI < PMI2 | MPI < MP2 |
| P. fluorescens (0.5 % w/v) | Individual | Y = C1a = C1b = Kernel's RME | S1 > S2 | Curzon's RME1 = Curzon's RME2 | AE1 < AE2 | sEF < cEF | CE1 > CE2 | PMI1 < MI < PMI2 | MPI < MP2 |
| P. fluorescens (0.5 % w/v) | Overall    | Y = C1a = C1b = Kernel's RME |         | Curzon's RME1 > Curzon's RME2 | AE1 < AE2 | sEF < cEF | CE1 > CE2 | PMI1 < MI < PMI2 | MPI < MP2 |
| B. megaterium (0.5 % w/v)  | Individual | Y = C1a = C1b = Kernel's RME | S1 > S2 | Curzon's RME1 = Curzon's RME2 | AE1 < AE2 | sEF < cEF | CE1 > CE2 | PMI1 < MI < PMI2 | MPI < MP2 |
| B. megaterium (0.5 % w/v)  | Overall    | Y = C1a = C1b = Kernel's RME |         | Curzon's RME1 > Curzon's RME2 | AE1 < AE2 | sEF < cEF | CE1 > CE2 | PMI1 < MI < PMI2 | MPI < MP2 |
| C. violaceum (0.5 % w/v)   | Individual | Y = C1a = C1b = Kernel's RME | S1 > S2 | Curzon's RME1 = Curzon's RME2 | AE1 < AE2 | sEF < cEF | CE1 > CE2 | PMI1 < MI < PMI2 | MPI < MP2 |
| C. violaceum (0.5 % w/v)   | Overall    | Y = C1a = C1b = Kernel's RME |         | Curzon's RME1 > Curzon's RME2 | AE1 < AE2 | sEF < cEF | CE1 > CE2 | PMI1 < MI < PMI2 | MPI < MP2 |
| C. violaceum (1 % w/v)     | Individual | Y = C1a = C1b = Kernel's RME | S1 > S2 | Curzon's RME1 = Curzon's RME2 | AE1 < AE2 | sEF < cEF | CE1 > CE2 | PMI1 < MI < PMI2 | MPI < MP2 |
| C. violaceum (1 % w/v)     | Overall    | Y = C1a = C1b = Kernel's RME |         | Curzon's RME1 > Curzon's RME2 | AE1 < AE2 | sEF < cEF | CE1 > CE2 | PMI1 < MI < PMI2 | MPI < MP2 |
| C. violaceum (2 % w/v)     | Individual | Y = C1a = C1b = Kernel's RME | S1 > S2 | Curzon's RME1 = Curzon's RME2 | AE1 < AE2 | sEF < cEF | CE1 > CE2 | PMI1 < MI < PMI2 | MPI < MP2 |
| C. violaceum (2 % w/v)     | Overall    | Y = C1a = C1b = Kernel's RME |         | Curzon's RME1 > Curzon's RME2 | AE1 < AE2 | sEF < cEF | CE1 > CE2 | PMI1 < MI < PMI2 | MPI < MP2 |

**Table S8** Correlation between green chemistry metrics for cyanide limiting reactions

| Pulp density and bacteria | Product    | Cyanide limiting reactions         |         |                               |           |           |           |                  |           |
|---------------------------|------------|------------------------------------|---------|-------------------------------|-----------|-----------|-----------|------------------|-----------|
|                           |            | Y2 = C1a = C1b = Kernel's RME = CE | S1 < S2 | Curzon's RME1 = Curzon's RME2 | AE1 < AE2 | sEF < cEF | CE1 > CE2 | PMI1 < MI < PMI2 | MPI < MP2 |
| P. fluorescens (1 % w/v)  | Individual | Y2 = C1a = C1b = Kernel's RME = CE | S1 < S2 | Curzon's RME1 = Curzon's RME2 | AE1 < AE2 | sEF < cEF | CE1 > CE2 | PMI1 < MI < PMI2 | MPI < MP2 |
| P. fluorescens (1 % w/v)  | Overall    | Y2 = C1a = C1b = Kernel's RME = CE |         | Curzon's RME1 < Curzon's RME2 | AE1 < AE2 | sEF < cEF | CE1 > CE2 | PMI1 < MI < PMI2 | MPI < MP2 |
| B. megaterium (1 % w/v)   | Individual | Y2 = C1a = C1b = Kernel's RME = CE | S1 < S2 | Curzon's RME1 = Curzon's RME2 | AE1 < AE2 | sEF < cEF | CE1 > CE2 | PMI1 < MI < PMI2 | MPI < MP2 |
| B. megaterium (1 % w/v)   | Overall    | Y2 = C1a = C1b = Kernel's RME = CE |         | Curzon's RME1 < Curzon's RME2 | AE1 < AE2 | sEF < cEF | CE1 > CE2 | PMI1 < MI < PMI2 | MPI < MP2 |
| C. violaceum (4 % w/v)    | Individual | Y2 = C1a = C1b = Kernel's RME = CE | S1 < S2 | Curzon's RME1 = Curzon's RME2 | AE1 < AE2 | sEF < cEF | CE1 > CE2 | PMI1 < MI < PMI2 | MPI < MP2 |
| C. violaceum (4 % w/v)    | Overall    | Y2 = C1a = C1b = Kernel's RME = CE |         | Curzon's RME1 < Curzon's RME2 | AE1 < AE2 | sEF < cEF | CE1 > CE2 | PMI1 < MI < PMI2 | MPI < MP2 |
| P. fluorescens (2 % w/v)  | Individual | Y2 = C1a = C1b = Kernel's RME = CE | S1 < S2 | Curzon's RME1 = Curzon's RME2 | AE1 < AE2 | sEF < cEF | CE1 > CE2 | PMI1 < MI < PMI2 | MPI < MP2 |
| P. fluorescens (2 % w/v)  | Overall    | Y2 = C1a = C1b = Kernel's RME = CE |         | Curzon's RME1 < Curzon's RME2 | AE1 < AE2 | sEF < cEF | CE1 > CE2 | PMI1 < MI < PMI2 | MPI < MP2 |
| B. megaterium (2 % w/v)   | Individual | Y2 = C1a = C1b = Kernel's RME = CE | S1 < S2 | Curzon's RME1 = Curzon's RME2 | AE1 < AE2 | sEF < cEF | CE1 > CE2 | PMI1 < MI < PMI2 | MPI < MP2 |
| B. megaterium (2 % w/v)   | Overall    | Y2 = C1a = C1b = Kernel's RME = CE |         | Curzon's RME1 < Curzon's RME2 | AE1 < AE2 | sEF < cEF | CE1 > CE2 | PMI1 < MI < PMI2 | MPI < MP2 |

### **Detailed explanation on the cyanide split in:**

The steps regarding the splitting of cyanide are explained using the results of *P. fluorescens* at 1 % w/v pulp density. Once the limiting reagent is determined, the percentage difference between the initial number of moles of free cyanide present in the system and the theoretical number of moles of cyanide required for the complete reaction of Pt, Pd and Rh was calculated. The percentage difference was found to be -1.59 %, implying that the amount of cyanide split between the PGM should give a percentage yield which is slightly higher than the percentage recovery of each metal. Hence, to obtain the number of moles of cyanide available for each metal, the theoretical number of moles of cyanide required for the complete reaction of each metal was reduced proportionately by the percentage difference. This approach was used for all metal-limiting reactions and when the percentage difference was less than -15 % for cyanide-limiting reactions.

However, the method was modified for cyanide-limiting reactions with large percentage differences namely, *P. fluorescens* at 2 % w/v pulp density and *B. megaterium* 2 % w/v pulp density. If the aforementioned method of splitting was used for these two experiments, the percentage yield of Rh would be 100 % (Table 3, Part 1). A percentage yield of 100 % was obtained because the number of moles of cyanide allocated to Rh was not sufficient. Since having a percentage yield equal to 100 % is not realistic from a practical perspective, an alternative method was conducted which is shown in Table 3, Part 2. The percentage yield of Rh was assumed to be 99 % (named “Rh99”) as Rh has the highest percentage recovery among the three bacteria. Emphasis was also given to Rh because Rh requires 6 moles of cyanide to react with one mole of Rh while Pt and Pd each only require 4 moles of cyanide for one mole of the metal. After determining the number of moles of cyanide allocated to Rh using the percentage yield equation, the number of moles of free cyanide left was calculated. To split the cyanide to Pt and Pd, E1 and E2 were used as shown in Table 3, Part 1.
